# Supplementary material for: Metabolic and Physiological Responses of Shiraz and Cabernet Sauvignon (Vitis vinifera L.) to Near Optimal Temperatures of 25 and 35 °C
Source: Int J Mol Sci. 2015 Oct 14;16(10):24276–94. doi: 10.3390/ijms161024276 (PMC4632749; doi:10.3390/ijms161024276)
Supplement: Supplementary file 1 [file ijms-16-24276-s001.xlsx]

## Sheet: Table S1
Table S1. Comparison between temperature treatments of relative metabolite content in leaves of Shiraz (Sh) and Cabernet Sauvignon (Cs) grown at 35 and 25 °C. For every comparison the p values of a t-test comparison are given (n = 12). Significant differences between the treatments are marked. The retention index (RI) is presented for every metabolite.
	RI	Cs 35	Cs 25	p-value (Cs 35/Cs 25)		Sh 35	Sh 25	p-value (Sh 35/Sh 25)
Pyruvic acid (2TMS)	1074	1.04489	0.917447	0.163505		1.13108	0.96653	0.128659
Alanine (2TMS)	1087	1.17729	0.855485	0.0383952		1.48881	0.930067	0.00293415
Phosphoric acid monomethyl ester (2TMS)	1166	0.848864	1.11431	0.334926		0.57158	0.565023	0.966032
Phosphoric acid (3TMS)	1262	1.32618	1.06508	0.311267		1.07495	0.703872	0.00196731
Threonine, DL- (2TMS)	1292	1.03553	1.02828	0.966751		0.862192	0.811787	0.822038
Glycine (3TMS)	1302	0.855116	1.29277	0.0172928		0.701166	1.0098	0.0277814
Maleic acid (2TMS)	1302	0.70826	0.983826	0.013206		1.12986	1.46749	0.0477378
Succinic acid (2TMS)	1311	0.608561	1.2619	1.32806e-05		0.717969	1.38084	0.00274268
Glyceric acid (3TMS)	1321	0.845829	1.51887	0.0298514		0.633908	1.24528	0.0218538
Uracil (2TMS)	1336	0.8679	1.23074	0.337911		1.01355	0.965718	0.846726
Fumaric acid (2TMS)	1348	0.951981	0.795287	0.373196		1.1227	0.966692	0.485409
Alanine (3TMS)	1357	1.11294	0.76649	0.106454		1.6598	0.805016	0.00196817
Serine (3TMS)	1353	0.620567	1.51925	0.00336242		0.652198	1.21484	0.0187705
Threonic acid-1,4-lactone (2TMS)	1375	0.742856	1.05267	0.0183387		0.919811	1.2487	0.119245
Threonine (3TMS)	1378	1.07164	1.12813	0.743247		0.838644	0.958946	0.547593
Malonic acid (3TMS)	1416	1.17694	0.934488	0.0109379		1.15295	0.970385	0.113551
2,4-Dihydroxybutanoic acid (3TMS)	1405	1.04924	1.20309	0.353961		0.785141	0.870901	0.342697
Aspartic acid (2TMS)	1422	1.31759	0.79072	0.0619697		1.17331	0.685212	0.0410559
Malic acid (3TMS)	1480	0.328033	0.913385	4.1398e-05		1.03969	1.83127	0.0116092
Malic acid (3TMS)	1480	0.600425	0.989947	0.00244531		1.10092	1.34196	0.152414
Pyroglutamic acid (1TMS)	1509	0.743438	0.790235	0.768155		0.589421	0.505357	0.544196
Pyroglutamic acid (2TMS)	1523	0.93823	1.0484	0.331466		0.868831	0.858442	0.922027
4-aminobutyric acid (3TMS)	1527	1.13882	1.23283	0.85707		1.16751	1.24556	0.77229
Glutamic acid (2TMS)	1528	0.939123	1.25579	0.0800752		0.749462	0.864643	0.513132
Erythronic acid (4TMS)	1532	1.15483	0.752523	0.0191804		1.33315	0.642193	0.012505
Threonic acid (4TMS)	1546	0.491209	0.729328	0.0889415		1.0857	1.98173	0.0322438
Serine 4TMS)	1565	0.60612	0.886973	0.0732171		0.907387	1.08571	0.353434
Glutaric acid, 2-oxo-(1MEOX) (2TMS) MP	1573	0.78996	1.11933	0.00845672		0.969752	1.00756	0.682531
Glutaric acid, 3-hydroxy-3-methyl- (3TMS)	1599	1.02936	1.02089	0.953242		1.1082	1.10491	0.979344
Glutamic acid (3TMS)	1614	0.697235	1.48174	0.0128739		0.665775	1.04678	0.0798113
Tartaric acid (4TMS)	1629	1.20064	1.11679	0.632727		0.955286	1.18284	0.174679
Tartaric acid (4TMS)	1629	1.24032	1.05448	0.217523		1.03059	1.00527	0.812376
Xylose, D- (1MEOX) (4TMS)	1637	0.812173	0.96295	0.084472		1.09506	1.34183	0.0452457
Lyxose (1MEOX) (4TMS) BP	1638	0.904154	0.957908	0.604512		1.07416	1.18197	0.281169
Ribulose (1MEOX) (4TMS) BP	1671	1.72758	1.01374	0.00267679		0.901541	0.628007	0.00777449
Fucose (1MEOX) (4TMS) MP	1716	1.01293	0.663616	0.00338616		1.2156	0.666465	0.00320157
Ribitol (5TMS)	1713	0.997519	1.03399	0.735927		1.01516	0.864132	0.0797493
Putrescine (4TMS)	1737	0.469105	1.67326	0.0315074		0.663211	1.94382	0.0382637
Glycerol-3-phosphate (4TMS)	1751	1.04144	0.988242	0.68479		1.05147	0.837728	0.0515999
Glucopyranose [-H20] (4TMS)	1758	0.904831	1.0611	0.153696		1.02462	0.907874	0.253234
Arabinonic acid (5TMS)	1768	1.07666	0.777688	0.0993532		1.21679	0.757743	0.0111486
4-hydroxy cis-cinnamic acid (2TMS)	1790	1.32979	1.04939	0.0375019		0.927822	0.833378	0.418685
Shikimic acid (4TMS)	1795	0.884481	1.20062	0.0572759		1.07913	1.27336	0.308953
Citric acid (4TMS)	1806	1.57904	1.13362	0.568176		1.37208	0.836061	0.0476004
Benzoic acid, 3,4-dihydroxy- (3TMS)	1814	1.00624	0.879686	0.25652		1.21559	0.925285	0.0756782
Dehydroascorbic acid dimer (2MEOX) MP	1841	0.791627	1.06932	0.0176951		0.799705	1.12022	0.00998541
Quinic acid (5TMS)	1843	0.772137	0.499227	0.218624		1.3244	1.50933	0.580415
Fructose (1MEOX) (5TMS) MP	1854	0.979455	1.08427	0.72581		0.748554	1.40763	0.00318395
Fructose (1MEOX) (5TMS) BP	1863	1.04087	1.13676	0.765201		0.776861	1.31495	0.000575131
Glucose (1MEOX) (5TMS) MP		0.471027	0.770887	0.0254588		0.869133	2.18291	0.0275362
Glucose (1MEOX) (5TMS) MP	1878	0.692865	0.959814	0.0150914		0.979578	1.40162	0.0606838
Glucuronic acid (1MEOX) (5TMS) MP		0.947215	0.694381	0.0158117		1.55397	1.07304	0.0285854
Glucuronic acid (1MEOX) (5TMS) MP	1921	0.734457	0.577462	0.0576063		1.41352	1.41364	0.999614
Ascorbic acid (4TMS)	1948	1.23713	0.965772	0.0277599		0.999469	0.871257	0.267301
Gallic acid (4TMS)	1939	0.685082	1.61486	0.0923419		0.666832	0.926089	0.149852
4-hydroxy trans-cinnamic acid (2TMS)	1946	1.54545	0.864029	0.0418833		0.992761	0.652773	0.024388
cis-caffeic acid, (3TMS)	1978	1.1562	0.901083	0.0054029		1.19211	1.03196	0.0959385
Galactonic acid (6TMS)	1980	1.06773	0.692376	0.00276413		1.52009	0.926105	7.04387e-05
Inositol, myo- (6TMS)	2085	0.90506	0.949571	0.591116		0.937538	1.16308	0.321523
trans-caffeic acid (3TMS)	2136	1.15903	0.877933	0.00143967		1.16824	1.07352	0.258143
Glucose-6-phosphate (1MEOX) (6TMS) MP	2307	0.801711	1.29032	0.00282051		0.636322	1.02098	0.000466755
Glucose-6-phosphate (1MEOX) (6TMS) BP	2329	0.794282	1.29121	0.010951		0.533487	1.04468	0.00236834
Sucrose (8TMS)	2622	0.75242	1.11467	0.000555343		0.747045	1.18405	0.00985855
Epicatechin	2842	0.633007	1.14457	0.0248913		1.0548	1.23499	0.665755
Epicatechin (5TMS)	2864	0.740073	0.940972	0.0850488		1.48696	1.08751	0.0146417
Epigallocatechin (6TMS)	3016	1.34614	1.36082	0.94536		0.903457	0.574583	0.0454187
Epigallocatechin	2915	1.17072	1.57399	0.280388		0.856641	0.745313	0.452399
Quercetin (5TMS)	3172	0.921638	0.934815	0.948227		1.08157	0.91494	0.526289
trans-5-O-caffeoyl-D-quinic acid (6TMS)	3176	1.85744	2.18787	0.254235		0.0549099	0.160312	0.323178
Raffinose (11TMS)	3349	0.903479	0.498833	0.0122083		1.60664	0.514024	0.000269754

## Sheet: Table S2
Table S2. Eigenvalues of the principle component analysis of the metabolic data set.
	Component 1 (Cultivar)			Component 2 (temperature treatment)
Quinic_acid,_5-caffeoyl,_-	-7.72587			Putrescine		-4.36985
Gluconic	1.31533			malate		-2.43986
Threonic	1.27362			glucose		-1.942
Quinate	1.22291			Raffinose		1.92373
glucose	1.07603			Serine		-1.75141
Epigallocatechin	-0.90072			Glyceric		-1.7512
Phosphoric	-0.84534			Glutamic		-1.69216
Ribulose	-0.77995			Alanine		1.49602
				Gallic		1.49504
				Erythronic		1.45777
				Succinic		-1.32144
				Fucose		1.23493

## Sheet: Table S3
Table S3. Comparison between cultivars in the relative metabolite content of leaves of Shiraz (Sh) and Cabernet Sauvignon (Cs) grown at 35 and 25 °C. For every comparison the p values of a t-test comparison are given (n = 12). Significant differences between the treatments are marked.
	Cs 35	Sh 35	Cs 35/Sh 35		Cs 25	Sh 25	Cs 25/Sh 25
Pyruvic acid (2TMS)	1.04489	1.13108	0.754144		0.917447	0.96653	0.653802
Alanine (2TMS)	1.17729	1.48881	0.318529		0.855485	0.930067	0.596967
Phosphoric acid monomethyl ester (2TMS)	0.848864	0.57158	0.0556532		1.11431	0.565023	0.0472014
Dodecane, n-	1.03863	1.10192	0.786008		0.922969	0.924012	0.991592
Phosphoric acid (3TMS)	1.32618	1.07495	0.201218		1.06508	0.703872	0.00593551
Threonine, DL- (2TMS)	1.03553	0.862192	0.142528		1.02828	0.811787	0.401755
Glycine (3TMS)	0.855116	0.701166	0.0833987		1.29277	1.0098	0.143204
Maleic acid (2TMS)	0.70826	1.12986	0.0112334		0.983826	1.46749	0.00163325
Succinic acid (2TMS)	0.608561	0.717969	0.0850901		1.2619	1.38084	0.551932
Glyceric acid (3TMS)	0.845829	0.633908	0.138725		1.51887	1.24528	0.429952
Uracil (2TMS)	0.8679	1.01355	0.753485		1.23074	0.965718	0.48867
Fumaric acid (2TMS)	0.951981	1.1227	0.598534		0.795287	0.966692	0.224358
Alanine (3TMS)	1.11294	1.6598	0.233633		0.76649	0.805016	0.790996
Serine (3TMS)	0.620567	0.652198	0.481332		1.51925	1.21484	0.348928
Threonic acid-1,4-lactone (2TMS)	0.742856	0.919811	0.12269		1.05267	1.2487	0.363096
Threonine (3TMS)	1.07164	0.838644	0.132494		1.12813	0.958946	0.461115
Malonic acid (3TMS)	1.17694	1.15295	0.508946		0.934488	0.970385	0.707649
Butanoic acid, 2,4-dihydroxy- (3TMS)	1.04924	0.785141	0.0486871		1.20309	0.870901	0.047207
Aspartic acid (2TMS)	1.31759	1.17331	0.516599		0.79072	0.685212	0.430301
Malic acid (3TMS)	0.328033	1.03969	0.00832868		0.913385	1.83127	0.000302772
Malic acid (3TMS)	0.600425	1.10092	8.20361e-06		0.989947	1.34196	0.0530085
Pentadecane, n-	1.15035	1.06922	0.282864		0.948211	0.876829	0.299579
Pyroglutamic acid (1TMS)	0.743438	0.589421	0.363012		0.790235	0.505357	0.0589907
Pyroglutamic acid (2TMS)	0.93823	0.868831	0.540111		1.0484	0.858442	0.103432
Butanoic acid, 4-amino- (3TMS)	1.13882	1.16751	0.89651		1.23283	1.24556	0.966546
Glutamic acid (2TMS)	0.939123	0.749462	0.659897		1.25579	0.864643	0.0299576
Erythronic acid (4TMS)	1.15483	1.33315	0.73418		0.752523	0.642193	0.325452
Threonic acid (4TMS)	0.491209	1.0857	8.48646e-05		0.729328	1.98173	0.00524994
Serine 4TMS)	0.60612	0.907387	0.0936722		0.886973	1.08571	0.269299
Glutaric acid, 2-oxo-(1MEOX) (2TMS) MP	0.78996	0.969752	0.00912291		1.11933	1.00756	0.388358
Glutaric acid, 3-hydroxy-3-methyl- (3TMS)	1.02936	1.1082	0.344944		1.02089	1.10491	0.479946
Glutamic acid (3TMS)	0.697235	0.665775	0.556775		1.48174	1.04678	0.162394
Tartaric acid (4TMS)	1.20064	0.955286	0.23055		1.11679	1.18284	0.721451
Tartaric acid (4TMS)	1.24032	1.03059	0.123424		1.05448	1.00527	0.694768
Xylose, D- (1MEOX) (4TMS)	0.812173	1.09506	0.00154727		0.96295	1.34183	0.00452525
Lyxose (1MEOX) (4TMS) BP	0.904154	1.07416	0.107776		0.957908	1.18197	0.0393345
Ribulose (1MEOX) (4TMS) BP	1.72758	0.901541	0.000635007		1.01374	0.628007	0.000715529
Fucose (1MEOX) (4TMS) MP	1.01293	1.2156	0.307668		0.663616	0.666465	0.971186
Ribitol (5TMS)	0.997519	1.01516	0.869881		1.03399	0.864132	0.0966412
Putrescine (4TMS)	0.469105	0.663211	0.344932		1.67326	1.94382	0.708073
Glycerol-3-phosphate (4TMS)	1.04144	1.05147	0.985563		0.988242	0.837728	0.0618001
Glucopyranose [-H20] (4TMS)	0.904831	1.02462	0.312354		1.0611	0.907874	0.162135
Arabinonic acid (5TMS)	1.07666	1.21679	0.492673		0.777688	0.757743	0.852713
Cinnamic acid, 4-hydroxy-, cis- (2TMS)	1.32979	0.927822	0.0074027		1.04939	0.833378	0.0552842
Octadecane, n-	1.10365	1.0698	0.63771		0.955681	0.936969	0.805336
Shikimic acid (4TMS)	0.884481	1.07913	0.137685		1.20062	1.27336	0.713831
Citric acid (4TMS)	1.57904	1.37208	0.712163		1.13362	0.836061	0.203597
Benzoic acid, 3,4-dihydroxy- (3TMS)	1.00624	1.21559	0.268003		0.879686	0.925285	0.58318
Dehydroascorbic acid dimer (2MEOX) MP	0.791627	0.799705	0.404486		1.06932	1.12022	0.713639
Quinic acid (5TMS)	0.772137	1.3244	0.0846773		0.499227	1.50933	0.00114057
Fructose (1MEOX) (5TMS) MP	0.979455	0.748554	0.500022		1.08427	1.40763	0.13192
Fructose (1MEOX) (5TMS) BP	1.04087	0.776861	0.443054		1.13676	1.31495	0.277417
Glucose (1MEOX) (5TMS) MP	0.471027	0.869133	0.11954		0.770887	2.18291	0.0159604
Glucose (1MEOX) (5TMS) MP	0.692865	0.979578	0.012551		0.959814	1.40162	0.0410881
Glucuronic acid (1MEOX) (5TMS) MP	0.947215	1.55397	0.0123006		0.694381	1.07304	4.9387e-05
Glucuronic acid (1MEOX) (5TMS) MP	0.734457	1.41352	6.57546e-05		0.577462	1.41364	0.00125816
Ascorbic acid (4TMS)	1.23713	0.999469	0.0315545		0.965772	0.871257	0.418321
Gallic acid (4TMS)	0.685082	0.666832	0.73441		1.61486	0.926089	0.209936
Cinnamic acid, 4-hydroxy-, trans- (2TMS)	1.54545	0.992761	0.0621412		0.864029	0.652773	0.165554
Caffeic acid, cis- (3TMS)	1.1562	1.19211	0.489247		0.901083	1.03196	0.160422
Galactonic acid (6TMS)	1.06773	1.52009	0.00267832		0.692376	0.926105	0.0300402
Inositol, myo- (6TMS)	0.90506	0.937538	0.56612		0.949571	1.16308	0.331596
Caffeic acid, trans- (3TMS)	1.15903	1.16824	0.762223		0.877933	1.07352	0.0124661
Docosane, n-	1.13087	1.08174	0.557429		0.944577	0.940266	0.954511
Glucose-6-phosphate (1MEOX) (6TMS) MP	0.801711	0.636322	0.111028		1.29032	1.02098	0.0680058
Glucose-6-phosphate (1MEOX) (6TMS) BP	0.794282	0.533487	0.0807014		1.29121	1.04468	0.231954
Sucrose (8TMS)	0.75242	0.747045	0.820554		1.11467	1.18405	0.622358
Octacosane, n-	1.11337	1.09409	0.697793		0.958718	0.939514	0.780188
Epicatechin	0.633007	1.0548	0.0175063		1.14457	1.23499	0.82687
Epicatechin (5TMS)	0.740073	1.48696	6.29818e-07		0.940972	1.08751	0.314334
Epigallocatechin (6TMS)	1.34614	0.903457	0.0308312		1.36082	0.574583	2.66339e-05
Epigallocatechin	1.17072	0.856641	0.277091		1.57399	0.745313	0.00253394
Quercetin (5TMS)	0.921638	1.08157	0.646282		0.934815	0.91494	0.924554
Quinic acid, 5-caffeoyl-, trans- (6TMS)	1.85744	0.0549099	1.42569e-05		2.18787	0.160312	4.67286e-10
Raffinose (11TMS)	0.903479	1.60664	0.00351497		0.498833	0.514024	0.910921
